# Supplementary material for: Tuning the odd–even effect on two-dimensional assemblies of curcumin derivatives by alkyl chain substitution: a scanning tunnelling microscopy study
Source: Royal Society of Chemistry journal article supplement (doi:10.1039/d3cp00368j), 2023-01-01
Supplement: d3cp00368j1.pdf [file d3cp00368j1.pdf]

Electric Supplementary Information (ESI)

## **Tuning the odd–even effect on two-dimensional assemblies of curcumin derivatives by alkyl chain substitution: A scanning tunnelling microscopy study**

Suyi Liu,<sup>a,b</sup> Yasuo Norikane,<sup>\*b, c</sup> Seiji Tsuzuki,<sup>d</sup> Shotaro Ito<sup>e</sup> and Yoshihiro Kikkawa,<sup>\*b</sup>

<sup>a.</sup> *Graduate School of Science and Technology, University of Tsukuba, Ibaraki 305-8571, Japan*

<sup>b.</sup> *National Institute of Advanced Industrial Science and Technology (AIST), Tsukuba Central 5, 1-1-1 Higashi, Tsukuba, Ibaraki 305-8562, Japan*

<sup>c.</sup> *Faculty of Pure and Applied Sciences, University of Tsukuba, Ibaraki 305-8571, Japan*

<sup>d.</sup> *Department of Applied Physics, The university of Tokyo, Tokyo 113-8656, Japan*

<sup>e.</sup> *National Institute of Advanced Industrial Science and Technology (AIST Chugoku), 3-11-32, Kagamiyama, Higashihiroshima, Hiroshima 739-0046, Japan*

S11 Large scale STM images of curcumin (**CR**) compounds

S12 Large scale STM images of bisdemethoxycurcumin (**BC**) compounds

S13 Large scale STM images of tetra alkylated curcumin (**TC**) compounds

SI1 Large scale STM images of curcumin (CR) compounds

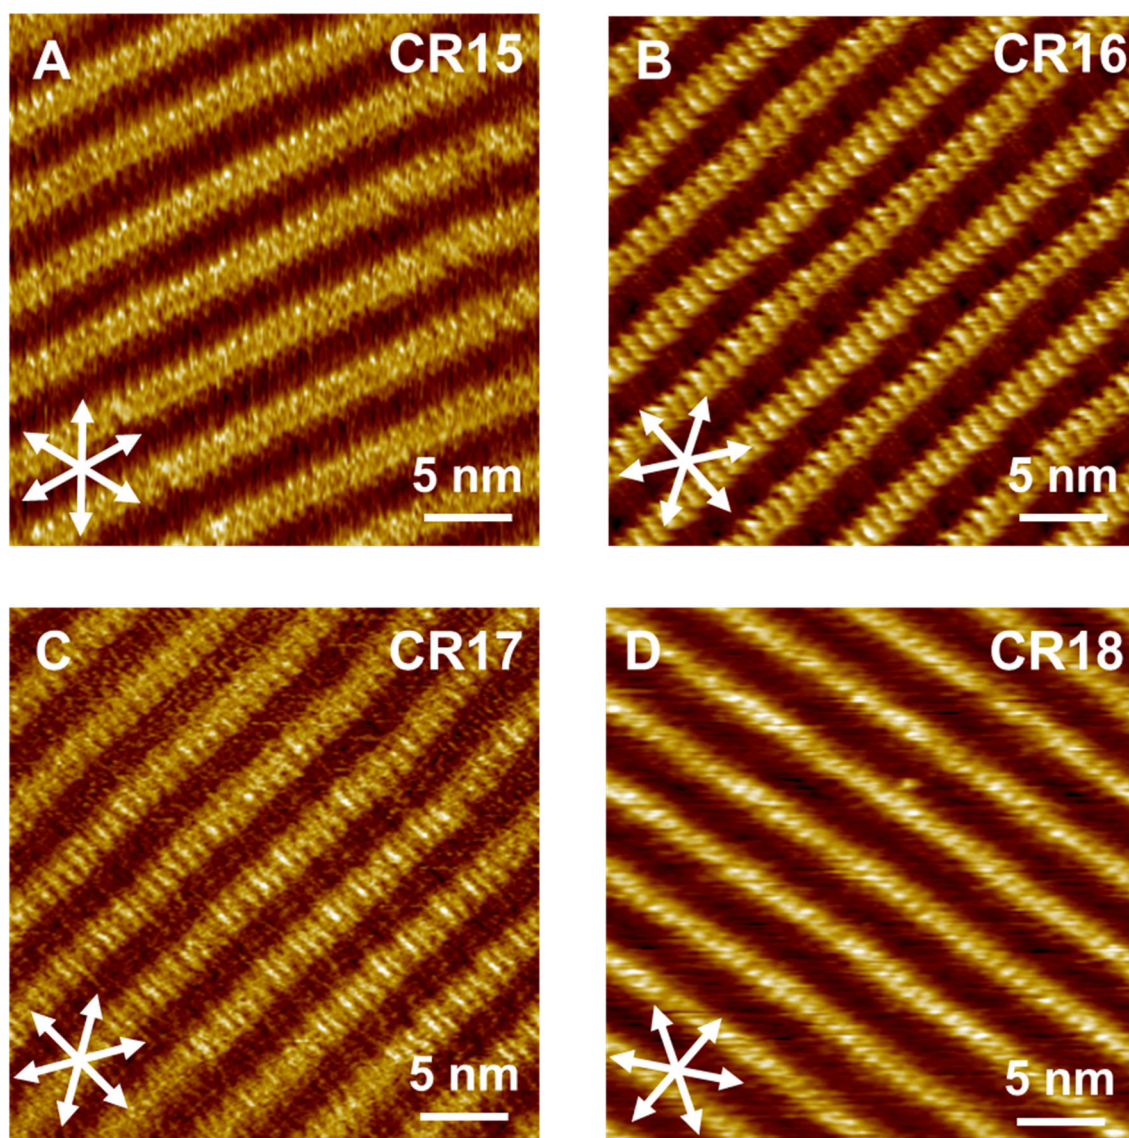

**Fig. S1** Large scale STM images of CR molecules (n=15-18) physisorbed at the HOPG/TCB interface. The sets of white arrows in each figure indicate the HOPG lattice directions. Tunnelling conditions: (A)  $I = 30$  pA,  $V = -1200$  mV; (B)  $I = 30$  pA,  $V = -390$  mV; (C)  $I = 30$  pA,  $V = -800$  mV; (D)  $I = 30$  pA,  $V = -850$  mV.

## SI2 Large scale STM images of bisdemethoxycurcumin (BC) compounds

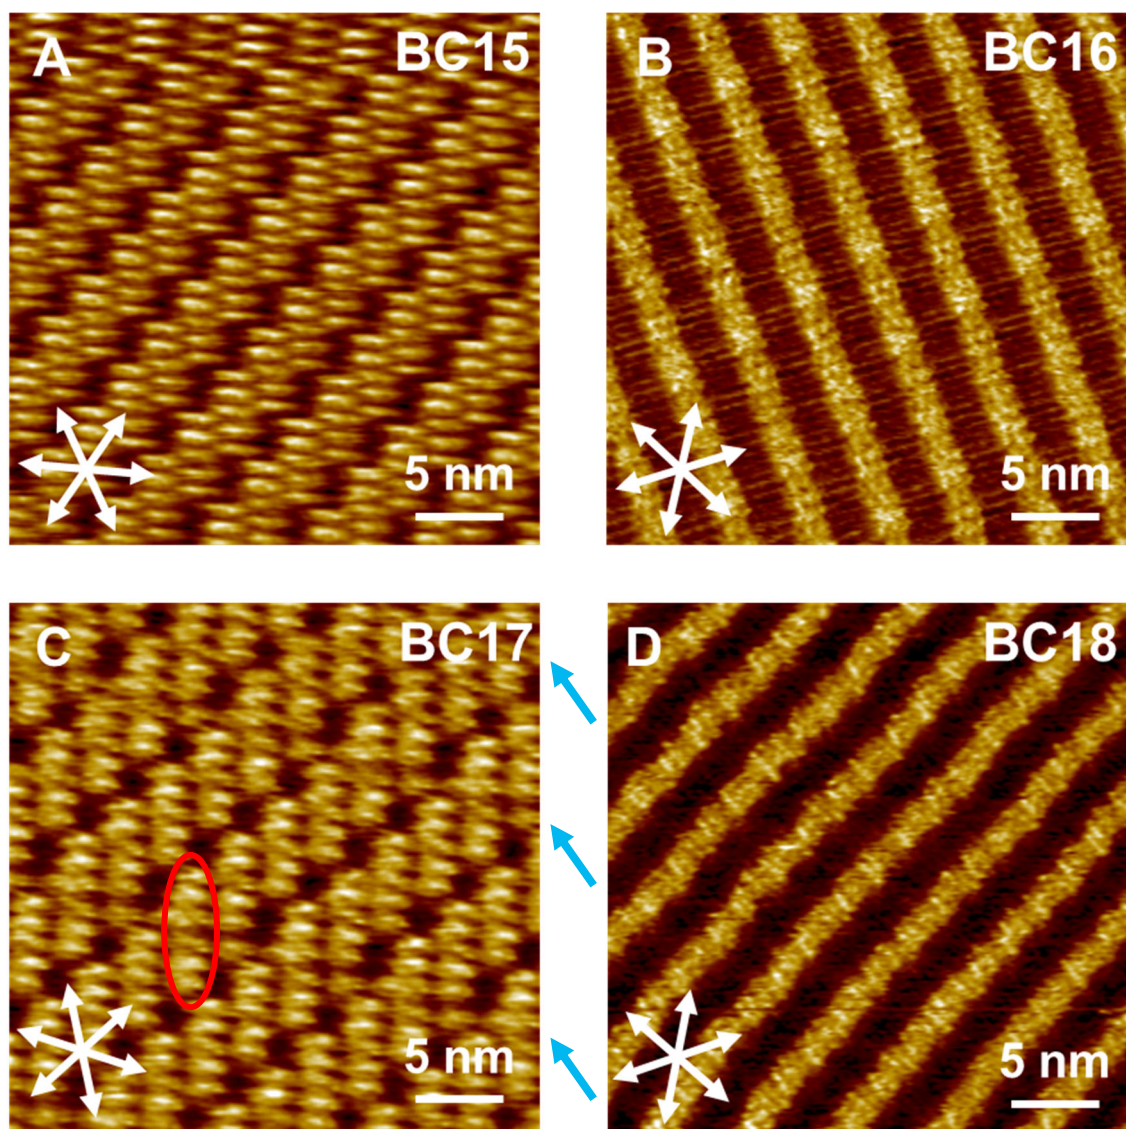

**Fig. S2** Large scale STM images of BC molecules (n=15-18) physisorbed at the HOPG/TCB interface. The sets of white arrows in each figure indicate the HOPG lattice directions. In S2C, one of the hexamers are circled in red and defects are indicated by blue arrows. The defective region may be formed by the adsorption of only core units in the BC17 compounds, although the molecules contain alkyl chain units. Tunnelling conditions: (A)  $I = 30 \text{ pA}$ ,  $V = -350 \text{ mV}$ ; (B)  $I = 30 \text{ pA}$ ,  $V = -1100 \text{ mV}$ ; (C)  $I = 30 \text{ pA}$ ,  $V = -900 \text{ mV}$ ; (D)  $I = 30 \text{ pA}$ ,  $V = -800 \text{ mV}$ .

### S13 Large scale STM images of tetra alkylated curcumin (TC) compounds

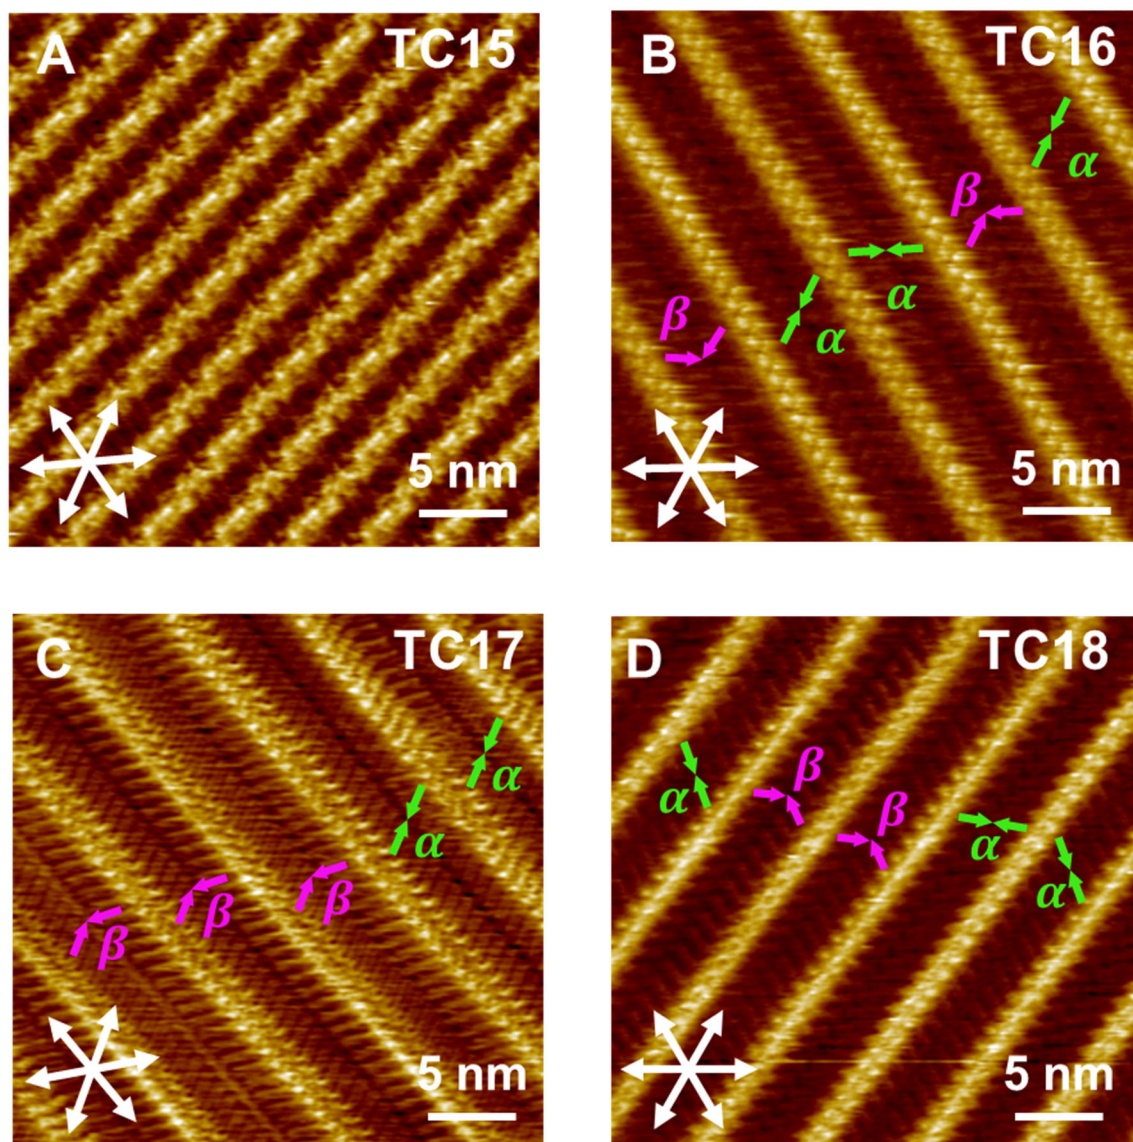

**Fig. S3** Large scale STM images of TC molecules (n=15-18) physisorbed at the HOPG/TCB interface. The sets of white arrows in each figure indicate the HOPG lattice directions. Two different contacting types such as straight ( $\alpha$  in green) and diagonal contacts ( $\beta$  in purple) of the terminal methyl groups were randomly observed in TC16-18 compounds. (A)  $I = 30$  pA,  $V = -950$  mV; (B)  $I = 30$  pA,  $V = -900$  mV; (C)  $I = 30$  pA,  $V = -800$  mV; (D)  $I = 30$  pA,  $V = -850$  mV.
